# Supplementary material for: Improved electrical performance of ultra-thin BexMg1−xO films using super-cycle atomic layer deposition
Source: Royal Society of Chemistry journal article supplement (doi:10.1039/d3tc04338j), 2024-01-01
Supplement: d3tc04338j1.pdf [file d3tc04338j1.pdf]

## Supplementary Information

### **Improved Electrical Performance of Ultra-thin $\text{Be}_x\text{Mg}_{1-x}\text{O}$ Films Using Super-cycle Atomic Layer Deposition**

Haewon Song,<sup>a</sup> Bowen Wang,<sup>a</sup> Jonghoon Shin,<sup>a</sup> Yu-Kyung Park,<sup>a</sup> Tae Kyun Kim,<sup>a</sup> Heewon Paik,<sup>a</sup> Haengha Seo,<sup>a</sup> Daeson Kwon,<sup>a</sup> Keonuk Lee,<sup>a</sup> Young Sin Kim,<sup>a</sup> Dong Hoon Shin,<sup>a</sup> and Cheol Seong Hwang <sup>\*a</sup>

<sup>a</sup> Department of Materials Science and Engineering, and Inter-University Semiconductor Research Center, Seoul National University, Seoul, 08826, Republic of Korea.

\* Author for correspondence. E-mail: [cheolsh@snu.ac.kr](mailto:cheolsh@snu.ac.kr)

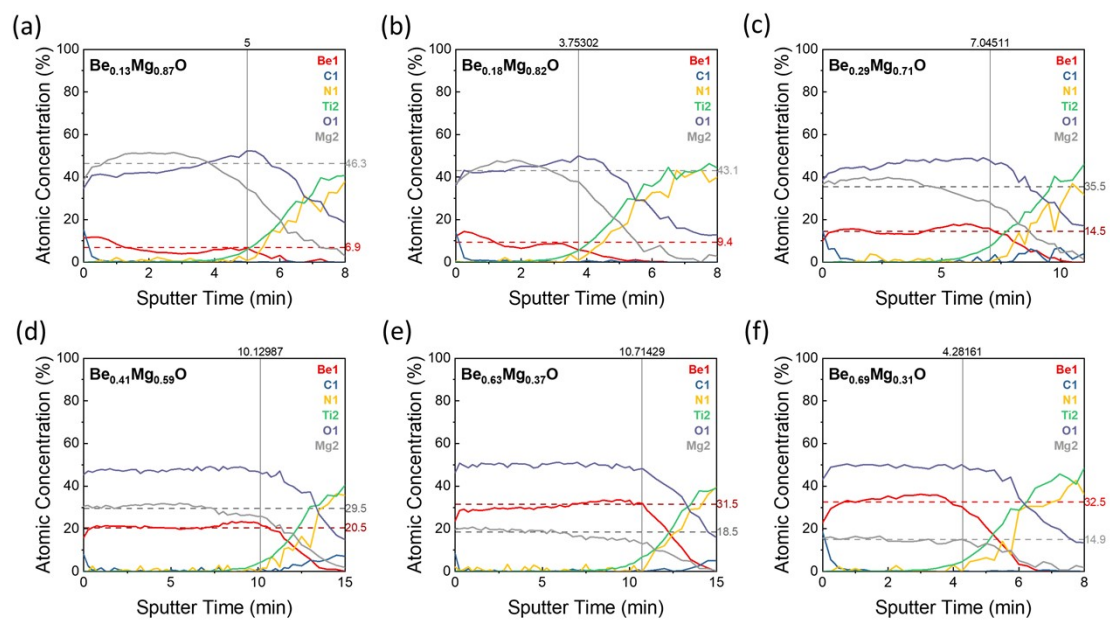

Fig. S1 AES depth profiles of BeMgO films with varying sub-cycle ratios, including Be:Mg ratios of (a) 1:5, (b) 1:3, (c) 1:2, (d) 1:1, (e) 2:1, and (f) 3:1.
